# Supplementary material for: Dynamic precipitation phase partitioning improves modeled simulations of snow across the Northwest US
Source: Copernicus journal article supplement (doi:10.5194/egusphere-2024-2284), 2024-08-16
Supplement: Supplementary file 1 [file egusphere-2024-2284-supplement.pdf]

## Supporting Information

### Dynamic precipitation phase partitioning improves modeled simulations of snow across the Northwest US

Bhupinderjeet Singh<sup>1</sup>, Mingliang Liu<sup>2</sup>, John Abatzoglou<sup>3</sup>, Jennifer Adam<sup>2</sup>, Kirti Rajagopalan<sup>1</sup>

<sup>1</sup>Department of Biological Systems Engineering, Washington State University, USA

<sup>2</sup>Department of Civil and Environmental Engineering, Washington State University, USA

<sup>3</sup>Management of Complex Systems, University of California, Merced, CA, USA

Correspondence to: Bhupinderjeet Singh ([bhupinderjeet.singh@wsu.edu](mailto:bhupinderjeet.singh@wsu.edu)) or Kirti Rajagopalan ([kirtir@wsu.edu](mailto:kirtir@wsu.edu))

**Table S1: Counts of station-years in bins of temperature and relative humidity groups. Bins correspond to average daily temperature (T) and relative humidity (RH) for wet days (precipitation > 1mm) between November and April.**

| <b>RH</b><br>↓ | <b>T</b><br>→ | <b>&lt;=-5</b> | <b>(-5,-4]</b> | <b>(-4,-3]</b> | <b>(-3,-2]</b> | <b>(-2,-1]</b> | <b>(-1,0]</b> | <b>(0,1]</b> | <b>(1,2]</b> | <b>(2,3]</b> | <b>(3,4]</b> | <b>(4,5]</b> | <b>&gt;5</b> |
|----------------|---------------|----------------|----------------|----------------|----------------|----------------|---------------|--------------|--------------|--------------|--------------|--------------|--------------|
| <b>&gt;80</b>  |               | 2              | 11             | 26             | 49             | 68             | 112           | 117          | 97           | 78           | 23           | 19           | 5            |
| <b>(70-80]</b> |               | 86             | 103            | 171            | 243            | 313            | 305           | 200          | 111          | 50           | 13           | 1            |              |
| <b>(60-70]</b> |               | 97             | 105            | 120            | 156            | 141            | 111           | 84           | 36           | 16           | 3            |              |              |
| <b>&lt;=60</b> |               | 5              | 8              | 9              | 9              | 1              | 1             | 1            |              |              |              |              |              |

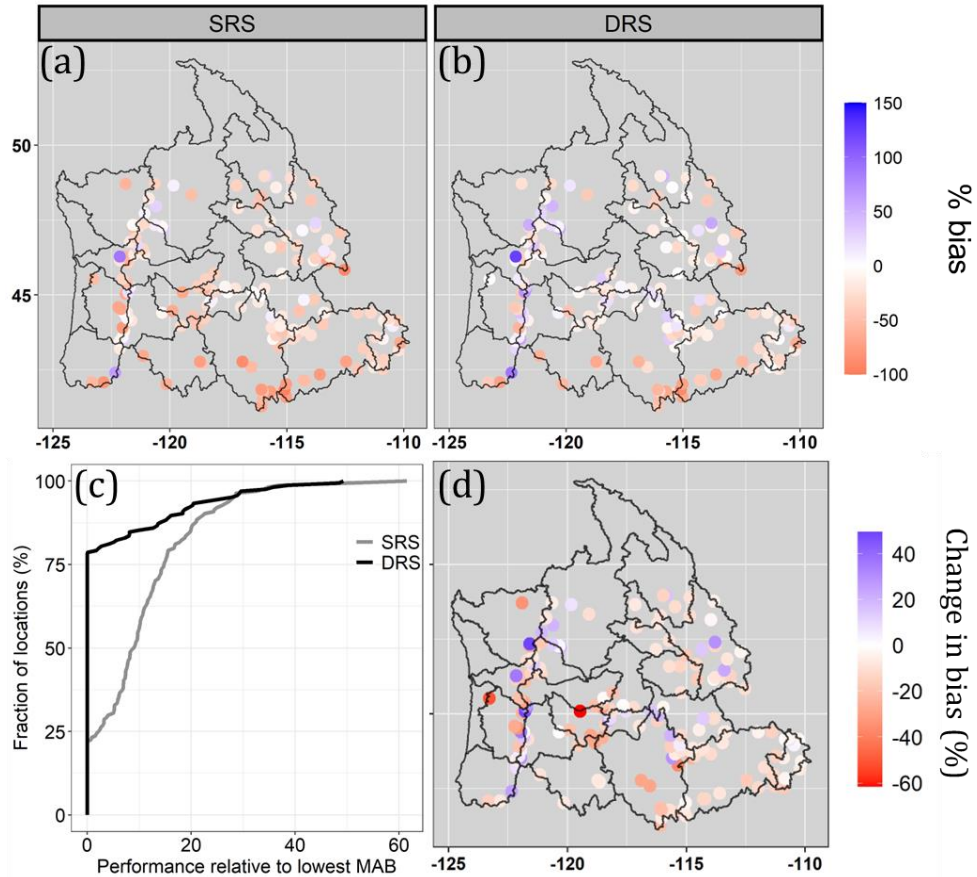

**Figure S1.** The relative bias in peak SWE (modeled - observed) over SNOTEL stations and the changes in relative bias between SRS and DRS precipitation partitioning methods. (a) and (b) Relative difference(%) in modeled and observed peak SWE for SRS and DRS partitioning, respectively. (c) Relative model performance (RMP) chart: The Y-axis is the fraction of stations for which a particular RMP is achieved, and the X-axis is the difference between each model's mean absolute relative bias (MARB) and the best-performing model's MARB. The closer a model's curve is to the Y-axis and for longer, the better. The length of a model's curve exactly on the Y-axis indicates how frequently the model is best performing, and the distance of the curve from the Y-axis indicates how much worse a model's performance is relative to the best model. See methods section 2.6.5 for more details on interpretation. (d) Change in absolute error ( $|\text{DRS \%bias}| - |\text{SRS \%bias}|$ ). Negative values (red) indicate where DRS method reduced the error and positive value (blue) indicate where the errors got worse with implementation of DRS method.
